# Supplementary material
Source: PubMed Central journal article supplement (PMC5632945)

**Fig. S1A**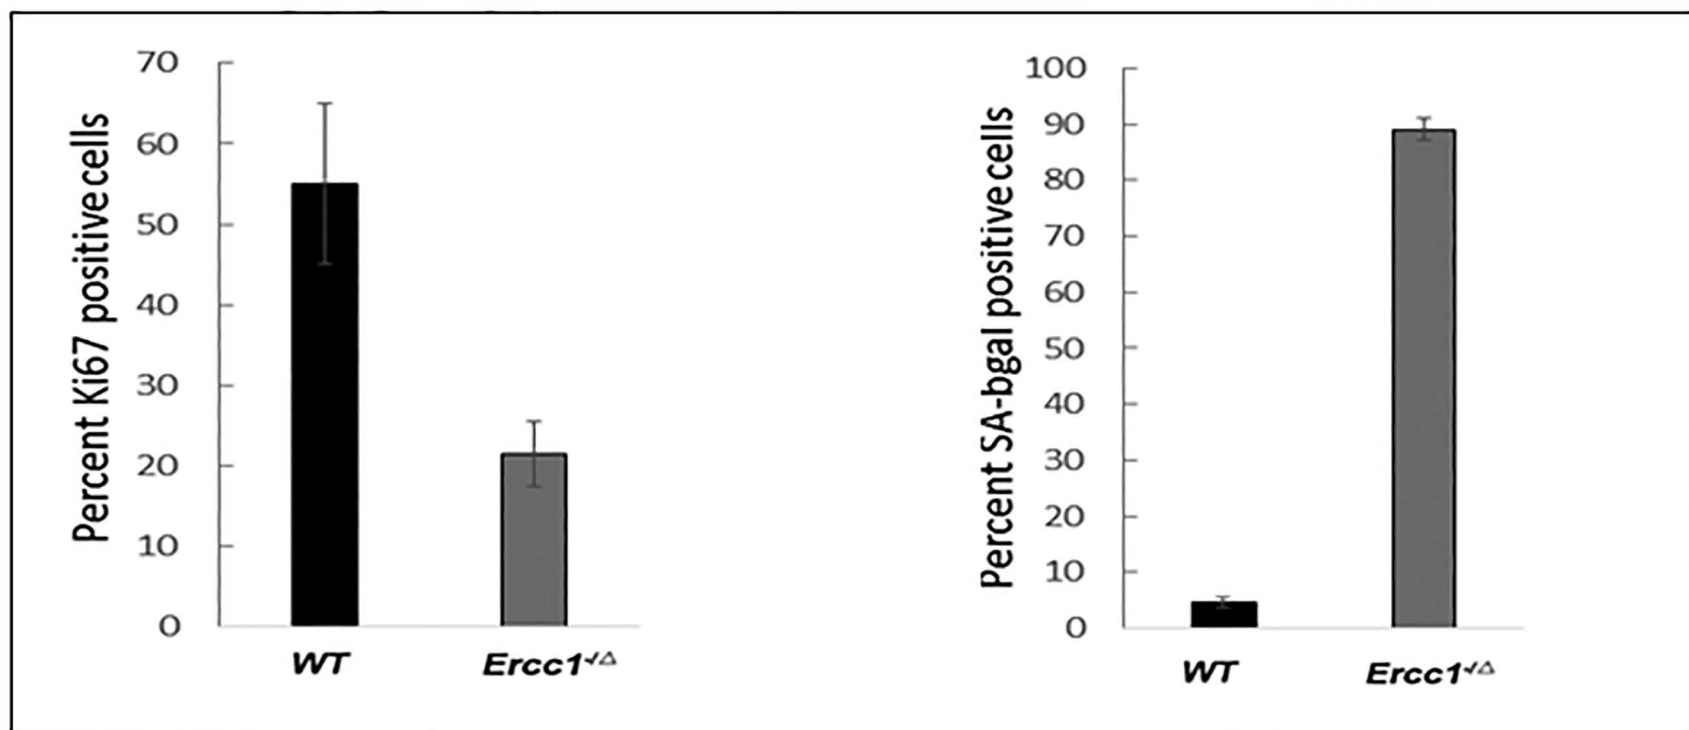**Fig. S1B**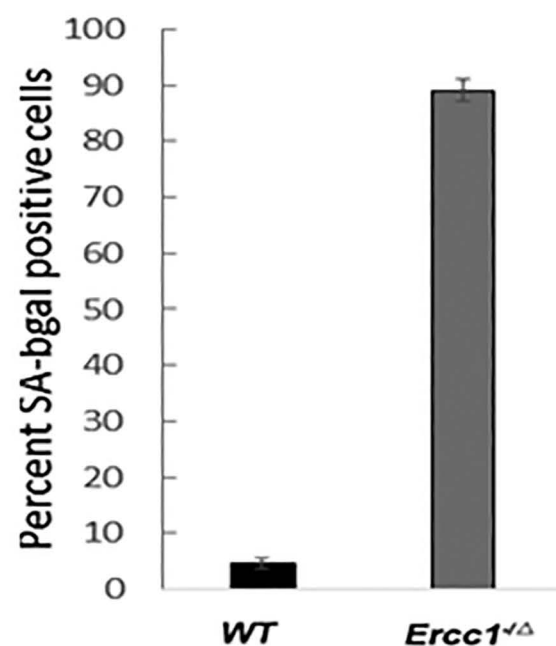**Fig. S2**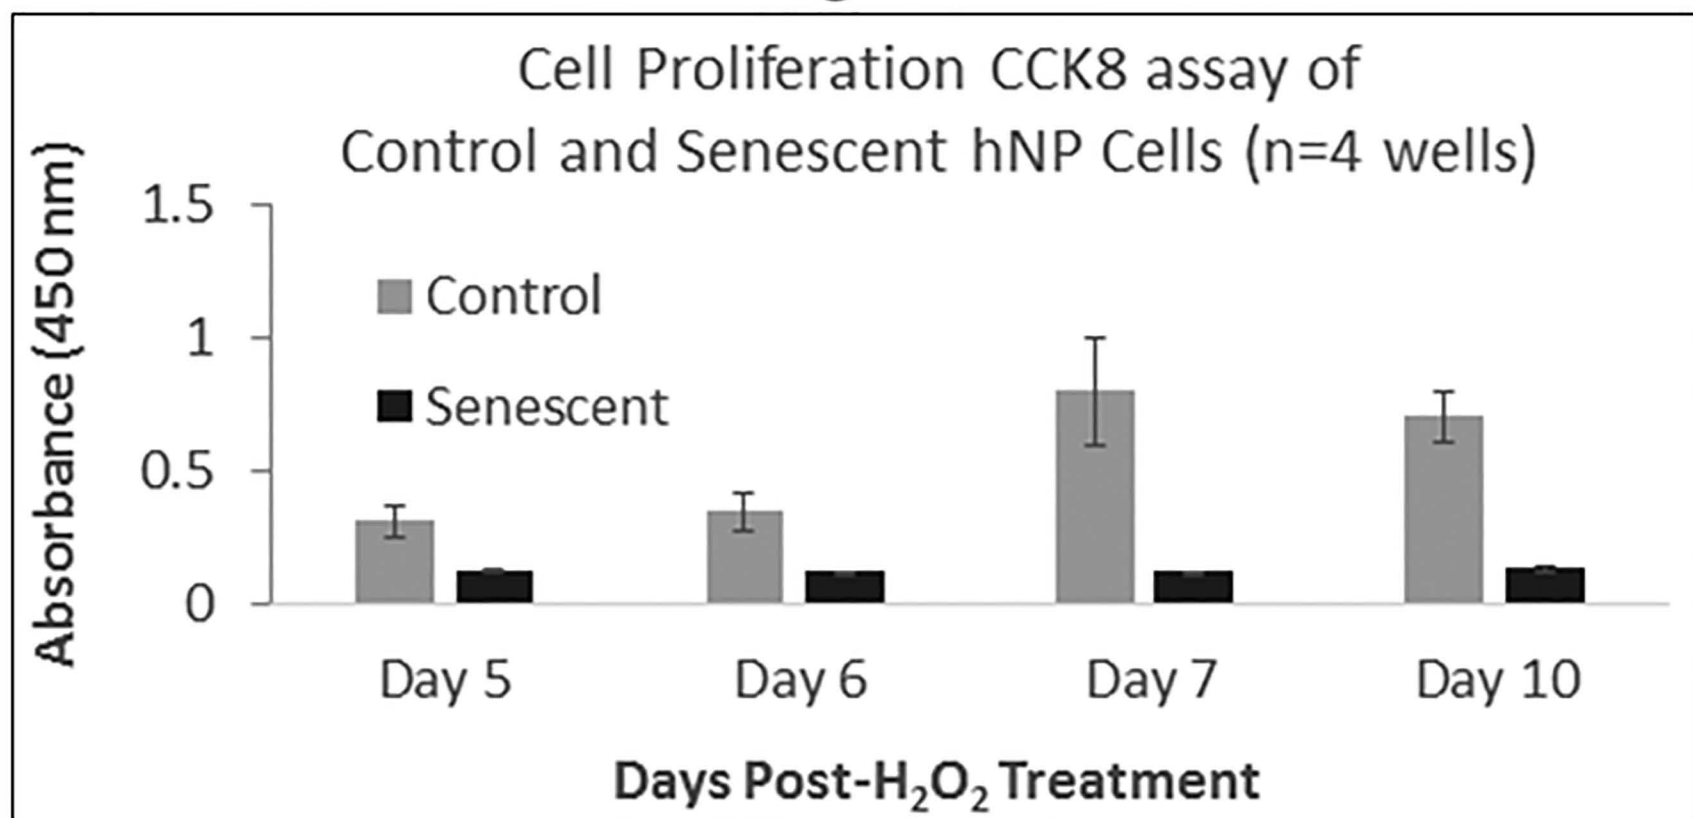

**Fig. S3A**

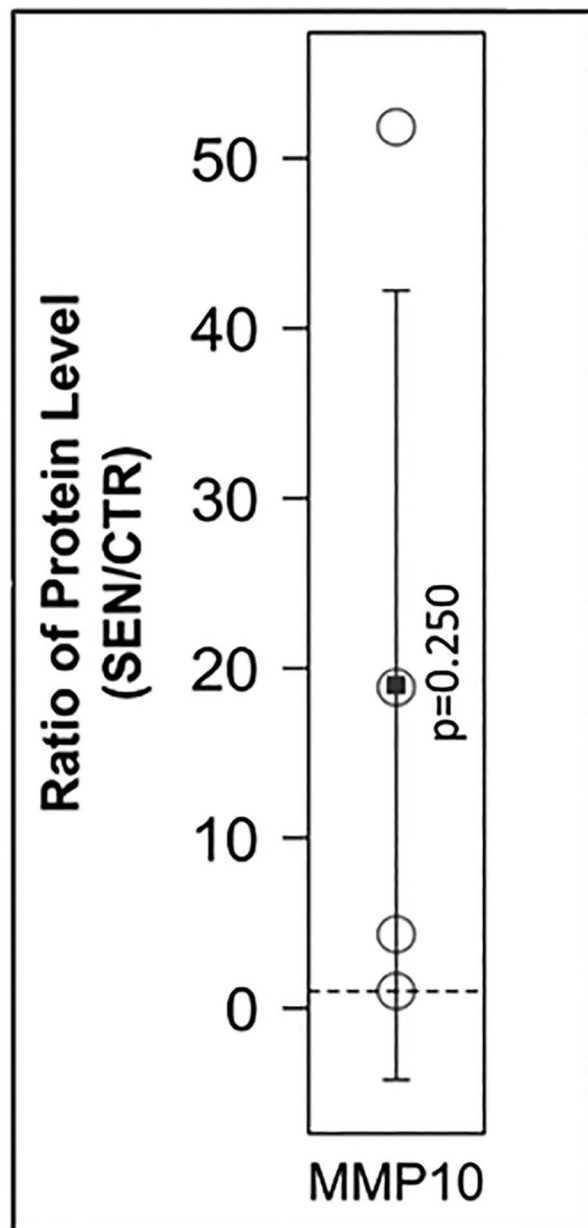

**Fig. S3B**

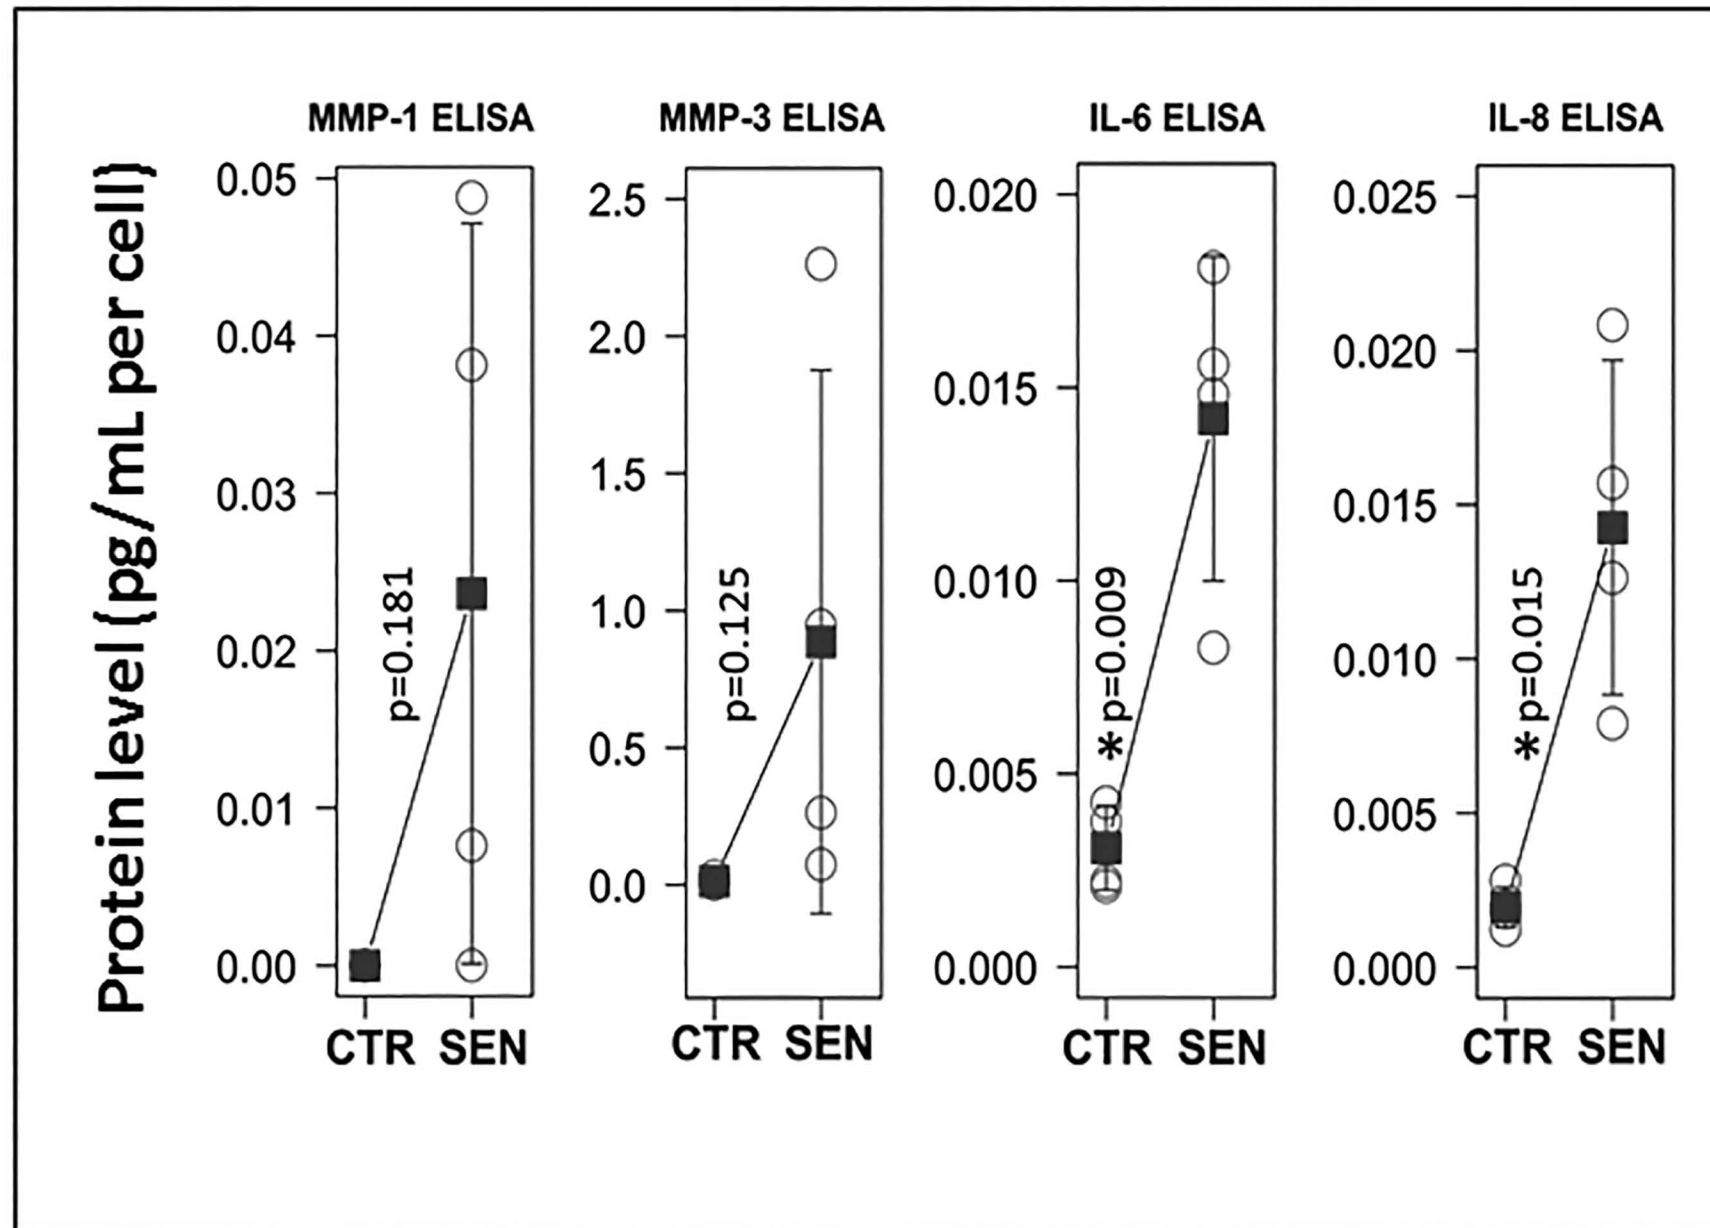

**Fig. S4**

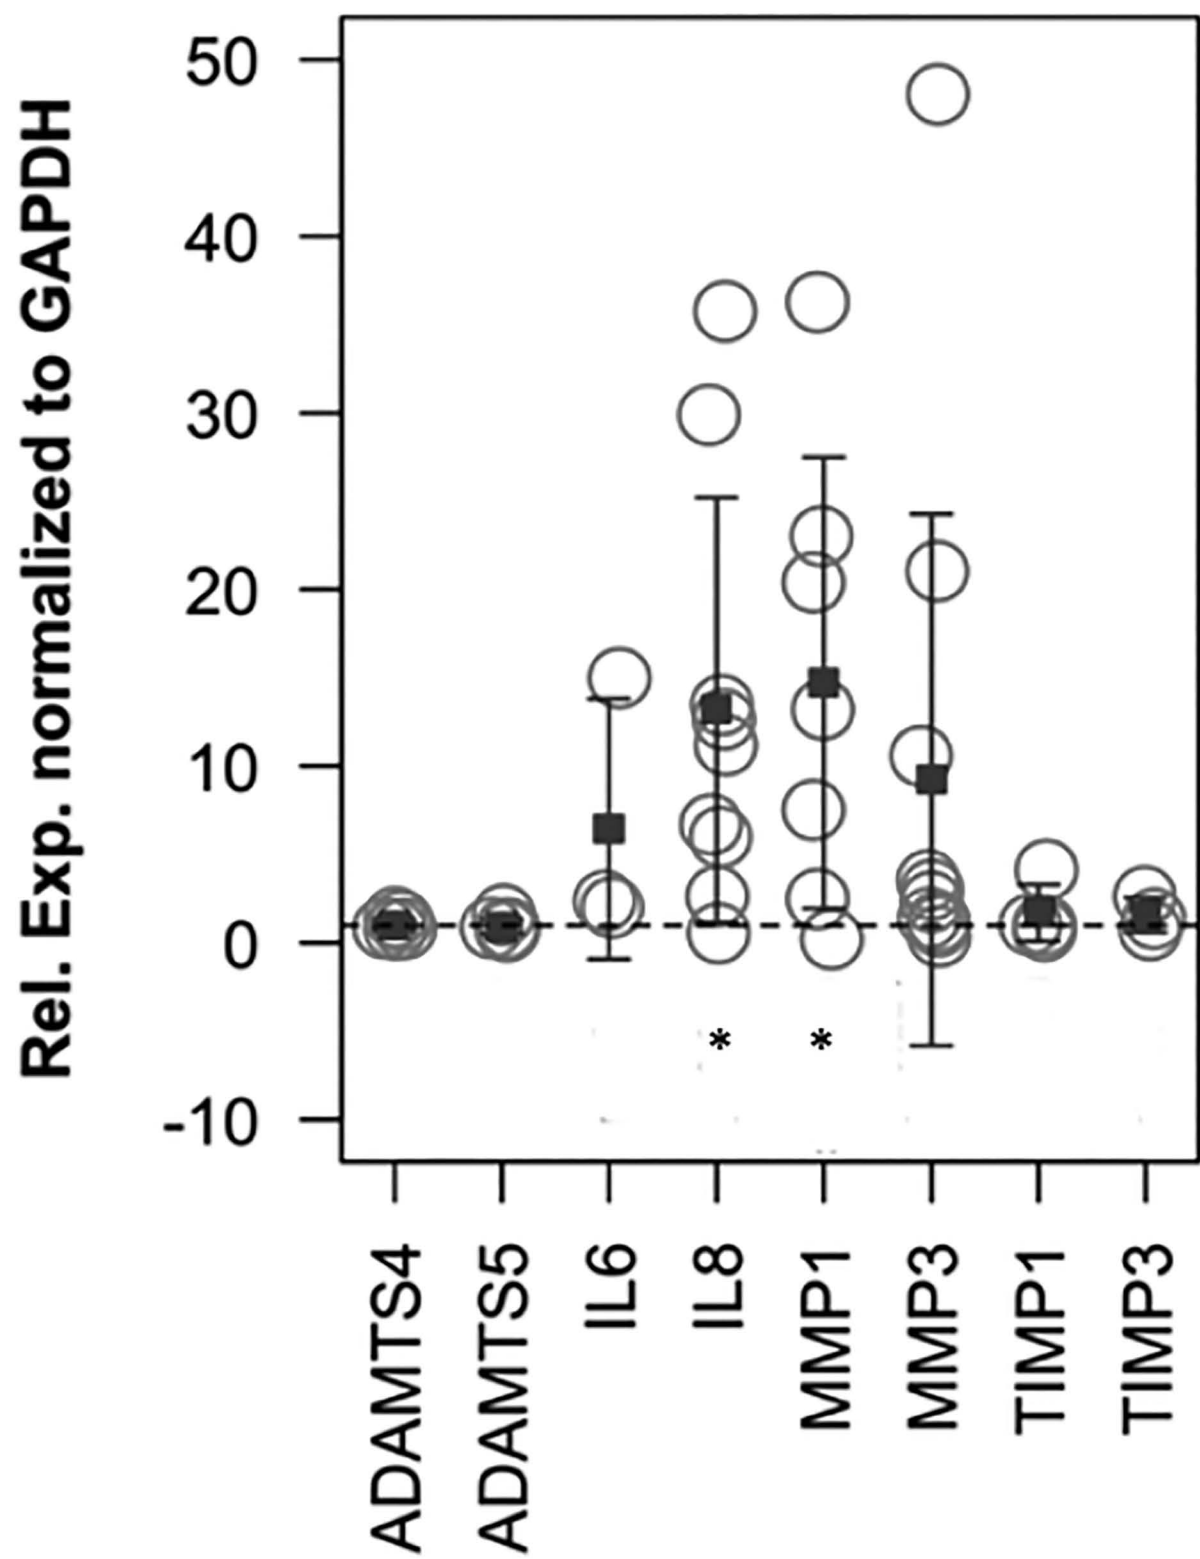

**Fig. S5**

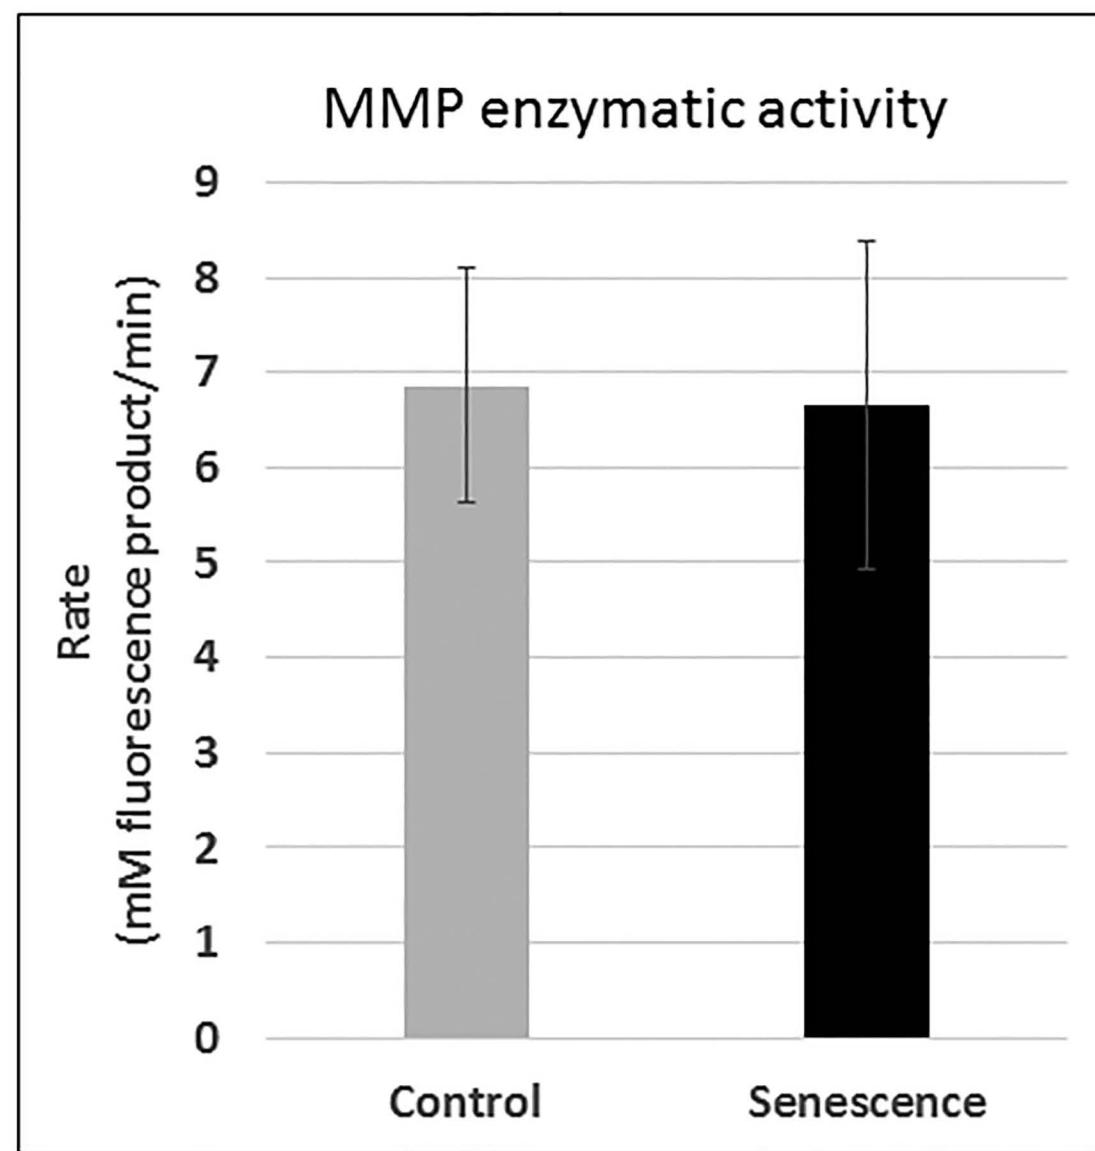

Supplement: NIHMS902622-supplement-2.pdf [file NIHMS902622-supplement-2.pdf]
